# Supplementary material
Source: publisher figshare collection journal article supplement (https://sage.figshare.com/ndownloader/files/15523244)
Supplement: Supplementary file 1 [file 15523244]

**Questionnaire : Pharmacists' and Technicians' Perceptions of  
Robotic IV Automation (RIVA)**

Please  ONE answer that reflects your **PERSONAL OPINION** or experience with RIVA.

Demographics (No names Nor ID Badge)

Manager / Senior Pharmacist / Pharmacist I / Pharmacist II / Pharmacist III

How often do you operate RIVA (circle)? Very Frequently • Frequently • Occasionally • Rarely • Very Rarely • Never

**Performance**

**1. In your opinion what is the turnaround of IV drug preparations manually?**

|          |               |         |               |           |
|----------|---------------|---------|---------------|-----------|
| Very Low | Below Average | Average | Above Average | Very High |
| 1        | 2             | 3       | 4             | 5         |

(1= Very Low and 5 =Very High)

**2. In your opinion what is the turnaround of IV drug preparations using RIVA?**

|          |               |         |               |           |
|----------|---------------|---------|---------------|-----------|
| Very Low | Below Average | Average | Above Average | Very High |
| 1        | 2             | 3       | 4             | 5         |

(1= Very Low and 5 =Very High)

**Satisfaction**

**3. In your opinion the workload of preparing IV medication manually is**

|                |                    |                                   |                      |                  |
|----------------|--------------------|-----------------------------------|----------------------|------------------|
| Very Demanding | Somewhat Demanding | Neither Demanding nor Undemanding | Somewhat Undemanding | Very Undemanding |
| 1              | 2                  | 3                                 | 4                    | 5                |

(1 = Very Demanding and 5 = Very Undemanding)

**4. In your opinion the workload of preparing IV medication with the RIVA is**

|                |                    |                                   |                      |                  |
|----------------|--------------------|-----------------------------------|----------------------|------------------|
| Very demanding | Somewhat Demanding | Neither Demanding nor Undemanding | Somewhat Undemanding | Very Undemanding |
| 1              | 2                  | 3                                 | 4                    | 5                |

(1 = Very Demanding and 5 = Very Undemanding)

**Safety**

**5. With regard to the patient's SAFETY, preparations made with the manual procedure is**

|             |                 |                         |               |           |
|-------------|-----------------|-------------------------|---------------|-----------|
| Very Unsafe | Somewhat Unsafe | Neither Unsafe nor Safe | Somewhat Safe | Very Safe |
| 1           | 2               | 3                       | 4             | 5         |

(1 = Very Unsafe and 5 = Very Safe)

**6. With regard to the patient's SAFETY, preparations made with RIVA is**

|             |                 |                         |               |           |
|-------------|-----------------|-------------------------|---------------|-----------|
| Very unsafe | Somewhat Unsafe | Neither Unsafe nor Safe | Somewhat Safe | Very Safe |
| 1           | 2               | 3                       | 4             | 5         |

(1 = Very Unsafe and 5 = Very Safe)

**Technology**

**7. The workload in the IV room AFTER the introduction of Robotic IV Automation is?**

|            |       |                |        |             |
|------------|-------|----------------|--------|-------------|
| Much lower | Lower | About the Same | Higher | Much Higher |
| 1          | 2     | 3              | 4      | 5           |

(1 = Much Lower and 5 = Much Higher)

**8. In your opinion can Robotic IV Automation replace manual preparations of IV medications?**

|                   |          |           |       |                |
|-------------------|----------|-----------|-------|----------------|
| Strongly Disagree | Disagree | Undecided | Agree | Strongly Agree |
| 1                 | 2        | 3         | 4     | 5              |

(1= Strongly Disagree and 5 = Strongly Agree)

**9. What is your opinion of the efficiency of RIVA in the preparations of IV medications?**

|           |      |            |      |           |
|-----------|------|------------|------|-----------|
| Very Poor | Poor | Acceptable | Good | Very Good |
| 1         | 2    | 3          | 4    | 5         |

(1 = Very Poor and 5 = Very Good)

**10. RIVA DOWNTIME affects the work flow in the IV ROOM?**

|                   |          |           |       |                |
|-------------------|----------|-----------|-------|----------------|
| Disagree Strongly | Disagree | Undecided | Agree | Strongly Agree |
| 1                 | 2        | 3         | 4     | 5              |

(1= Disagree Strongly and 5 = Strongly Agree)

**11. How important is the SPEED of the preparations by RIVA?**

|               |                    |                  |           |                |
|---------------|--------------------|------------------|-----------|----------------|
| Not Important | Slightly Important | Fairly Important | Important | Very Important |
| 1             | 2                  | 3                | 4         | 5              |

(1 = Not Important and 5 =Very Important)

**12. How important are the SAFETY features of Robotic IV automation to you?**

|               |                    |                  |           |                |
|---------------|--------------------|------------------|-----------|----------------|
| Not Important | Slightly Important | Fairly Important | Important | Very Important |
| 1             | 2                  | 3                | 4         | 5              |

(1 = Not Important and 5 =Very Important)

**13. Are you satisfied with the service provided by onsite engineer associated with RIVA?**

|                   |              |         |           |                |
|-------------------|--------------|---------|-----------|----------------|
| Very dissatisfied | Dissatisfied | Neither | Satisfied | Very satisfied |
| 1                 | 2            | 3       | 4         | 5              |

(1 = Very Dissatisfied and 5 = Very Satisfied)

**14. RIVA IMPROVES the efficiency of the IV medications preparations in the IV room?**

|                   |          |           |       |                |
|-------------------|----------|-----------|-------|----------------|
| Disagree Strongly | Disagree | Undecided | Agree | Strongly Agree |
| 1                 | 2        | 3         | 4     | 5              |

(1 = Disagree Strongly and 5 =Strongly Agree)

**15. I would recommend RIVA to my professional colleagues working in other institutions**

|                |              |          |               |            |
|----------------|--------------|----------|---------------|------------|
| Definitely Not | Probably Not | Probably | Very Probably | Definitely |
| 1              | 2            | 3        | 4             | 5          |

(1= Definitely Not and 5 = Definitely)

**16. Please rate your OVERALL impression of Robotic IV Automation**

| Very Poor | Poor | Acceptable | Good | Very Good |
|-----------|------|------------|------|-----------|
| 1         | 2    | 3          | 4    | 5         |

(1= Very Poor and 5 = Very Good)

**What are the limitations of Robotic IV Automation?** \_\_\_\_\_

\_\_\_\_\_

**Any other comments regarding the value of Robotic IV Automation**\_\_\_\_\_

\_\_\_\_\_
